# Supplementary material for: Enhancing the luminescence performance of Ca2−xSrxBO3Cl:Eu2+,Dy3+ by substitution of Sr2+ for Ca2+
Source: Royal Society of Chemistry journal article supplement (doi:10.1039/d2tc02382b), 2022-01-01
Supplement: d2tc02382b1.pdf [file d2tc02382b1.pdf]

## Supporting Information

**Enhancing luminescence performance of  $\text{Ca}_{2-x}\text{Sr}_x\text{BO}_3\text{Cl}:\text{Eu}^{2+},\text{Dy}^{3+}$  by substitution of  $\text{Sr}^{2+}$  for  $\text{Ca}^{2+}$  (TC-ART-06-2022-002382.R1)**

*Junlong Cao<sup>a</sup>, Songsong Ding<sup>a</sup>, Yunpeng Zhou<sup>a</sup>, Xilin Ma<sup>a</sup>, Yuhua Wang<sup>\*a</sup>*

<sup>a</sup> National and Local Joint Engineering Laboratory for Optical Conversion Materials and Technology of National Development and Reform Commission, Department of Materials Science,  
Cross-Strait Research and Technology Transfer Center for Optoelectronic Materials & Devices of Lanzhou University and Taiwan Kun Shan University,  
School of Materials and Energy, Lanzhou University, No. 222, South Tianshui Road,  
Lanzhou, Gansu, 730000, P. R. China.

\*Corresponding author' email: [wyh@lzu.edu.cn](mailto:wyh@lzu.edu.cn)

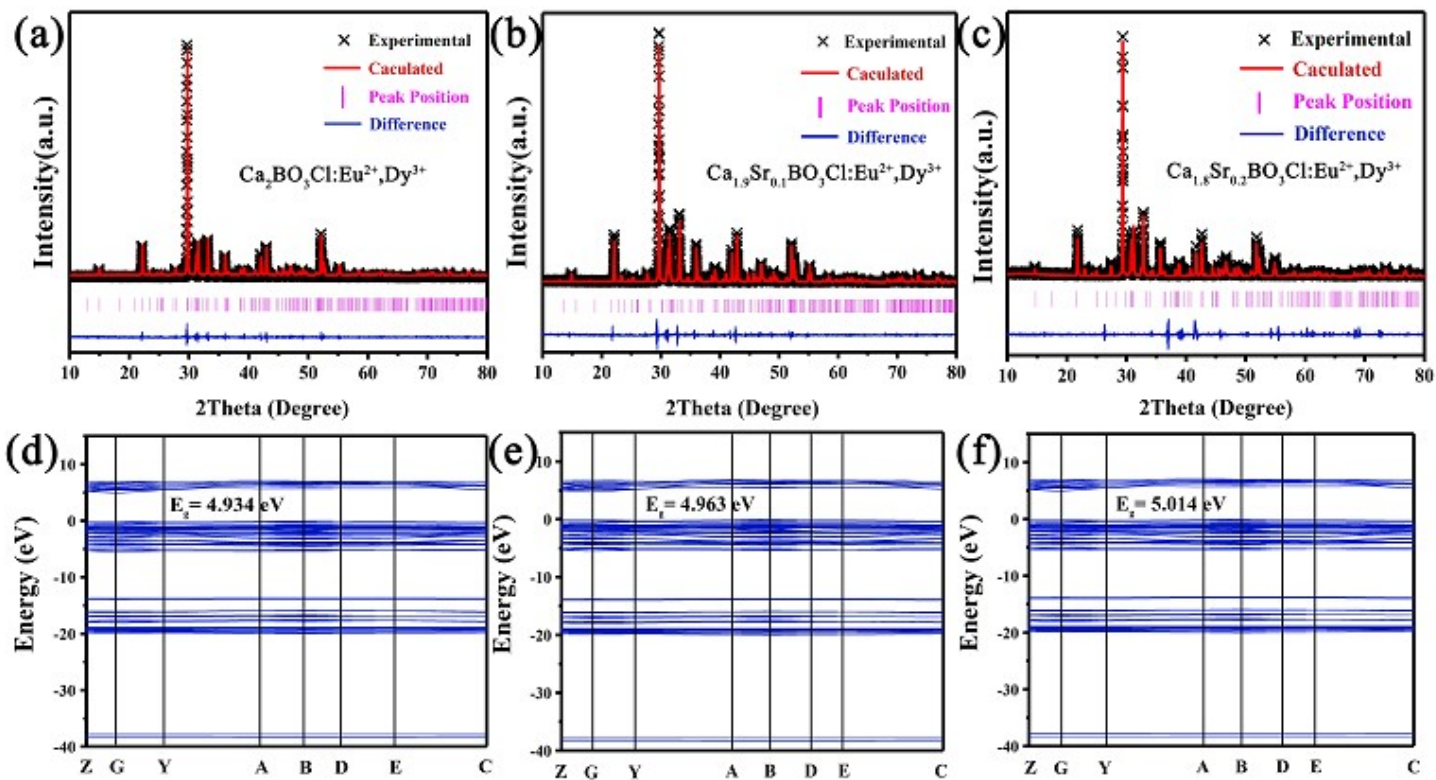

**Figure S1.** The XRD Rietveld refinement spectra of a)  $\text{Ca}_2\text{B}_3\text{Cl}$ ; b)  $\text{Ca}_{1.9}\text{Sr}_{0.1}\text{BO}_3\text{Cl}$ ; c)  $\text{Ca}_{1.8}\text{Sr}_{0.2}\text{BO}_3\text{Cl}$ ; The band structure of d)  $\text{Ca}_2\text{BO}_3\text{Cl}$ ; e)  $\text{Ca}_{1.9}\text{Sr}_{0.1}\text{BO}_3\text{Cl}$ ; f)  $\text{Ca}_{1.8}\text{Sr}_{0.2}\text{BO}_3\text{Cl}$ .

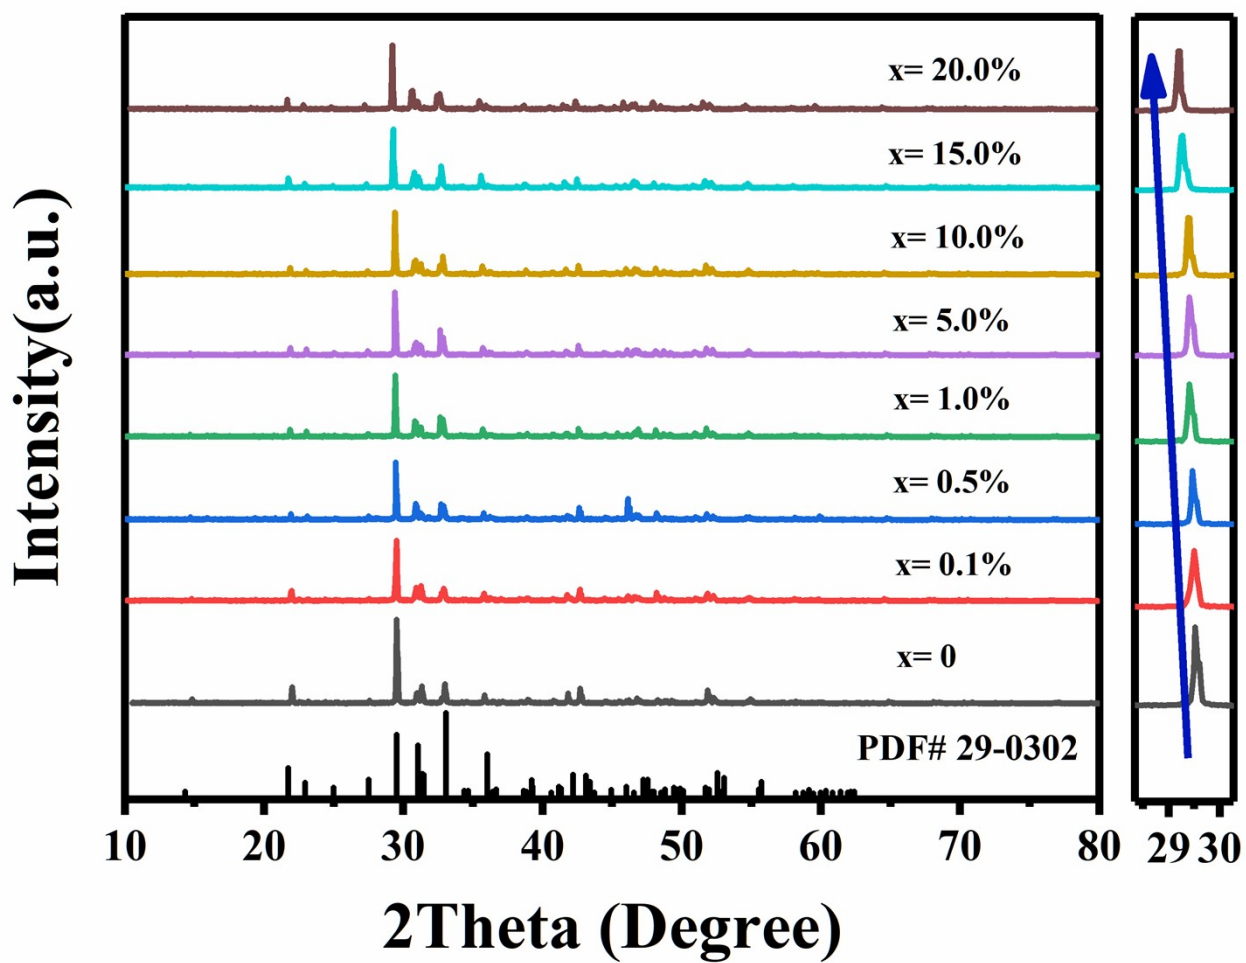

Figure S2. The XRD spectra of  $\text{Ca}_{2-x}\text{Sr}_x\text{BiO}_3\text{Cl}:\text{Eu}^{2+}, \text{Dy}^{3+}$ .

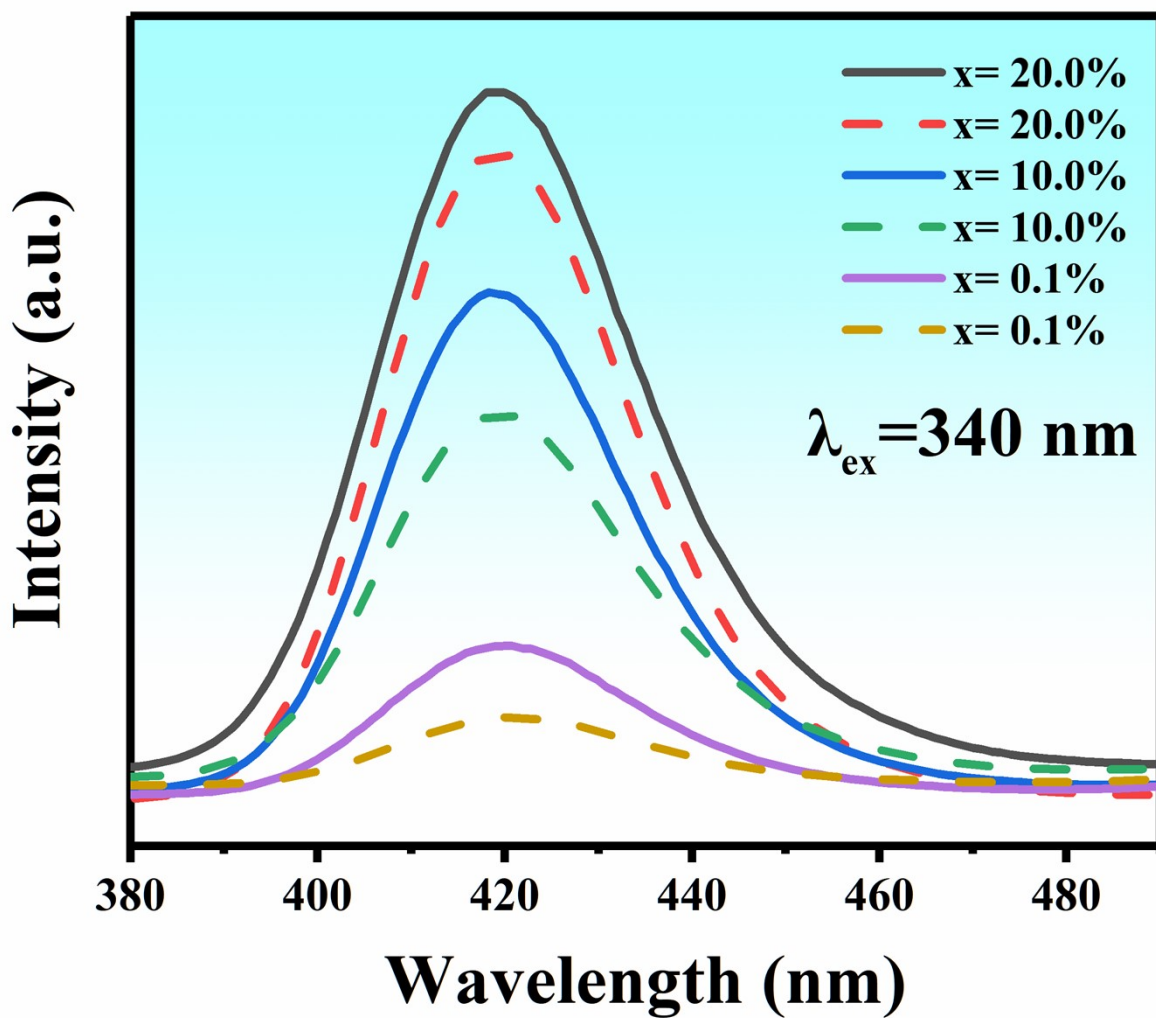

**Figure S3.** Comparison of the characteristic emission of  $\text{Ca}_{2-x}\text{BO}_3\text{Cl}$  ( $x=0,10\%,20\%$ ) oxygen vacancies in reducing atmosphere and vacuum atmosphere.

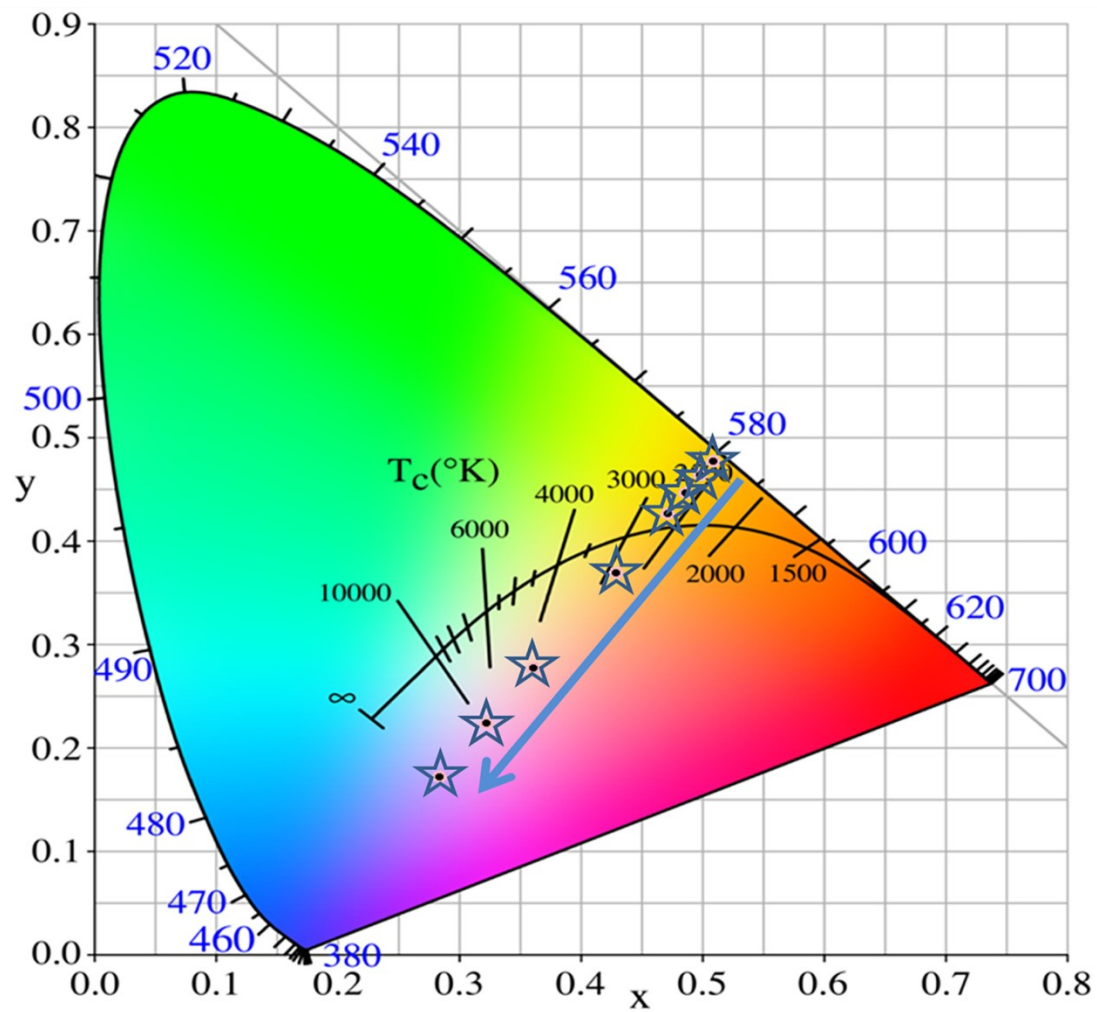

**Figure S4.** The CIE chromaticity diagram of the sample at different solid solution concentration.

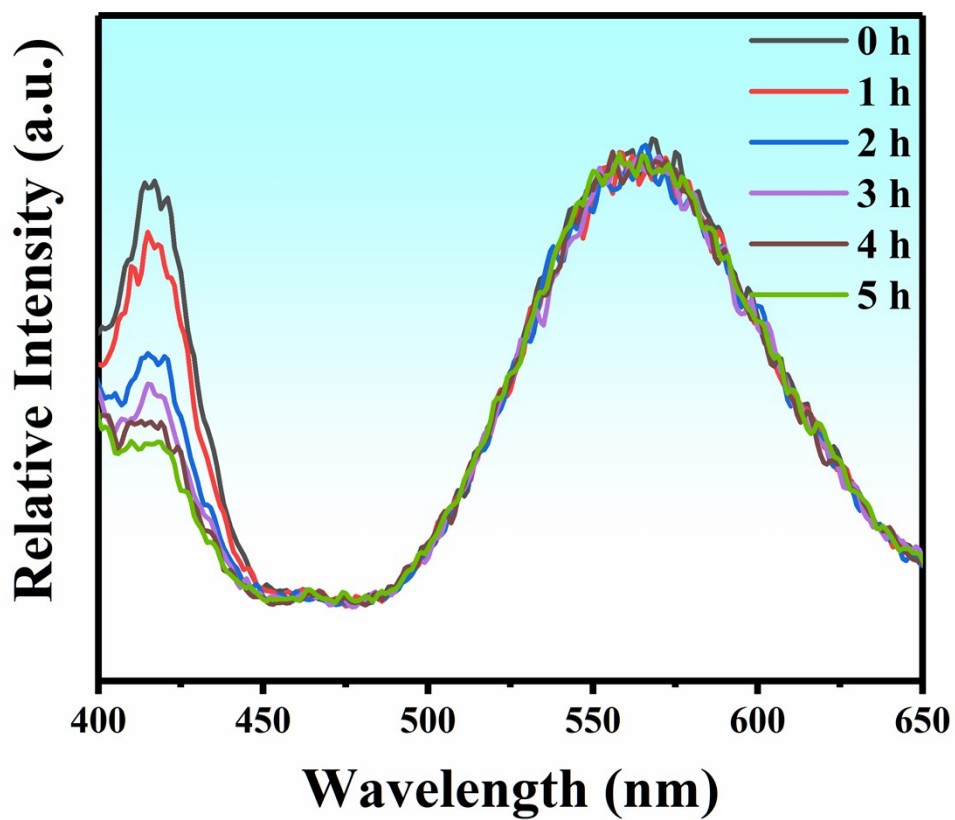

**Figure S5.** Spectra of sample under the excitation of a 340 nm UV on-chip LED for continuous working 5 h.

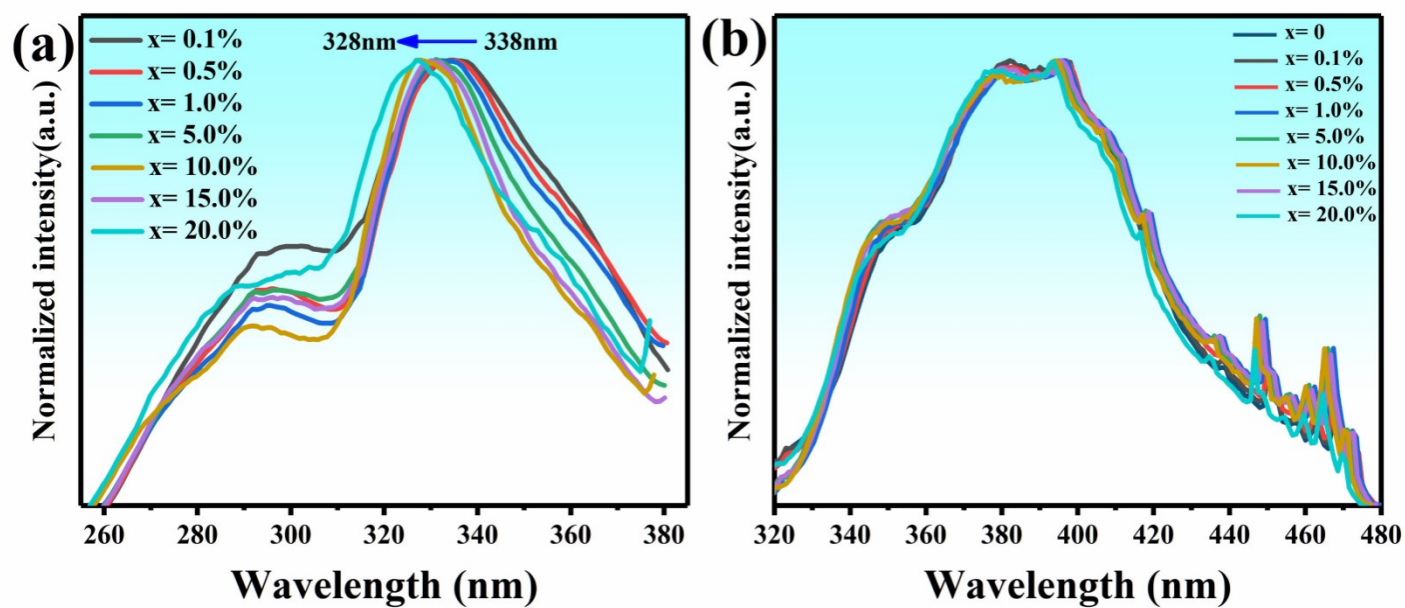

Figure S6. The normalized spectra of a) oxygen vacancies; b)Eu<sup>2+</sup>.

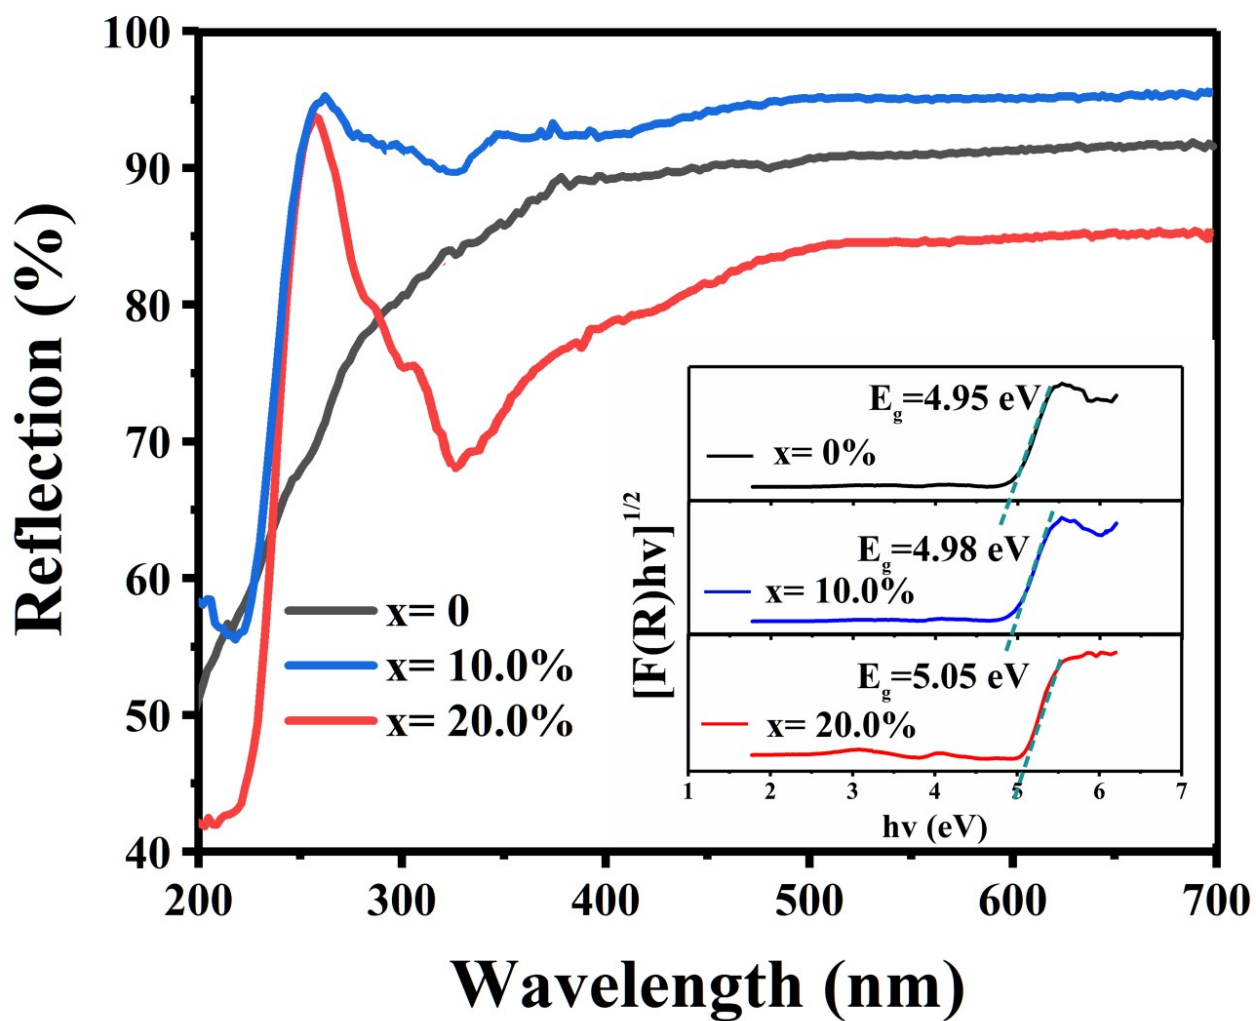

**Figure S7.** Diffuse reflection spectra of  $\text{Ca}_{2-x}\text{Sr}_x\text{BO}_3\text{Cl}$  (The inset exhibits the estimated optical bandgap of  $\text{Ca}_{2-x}\text{Sr}_x\text{BO}_3\text{Cl}$ ).



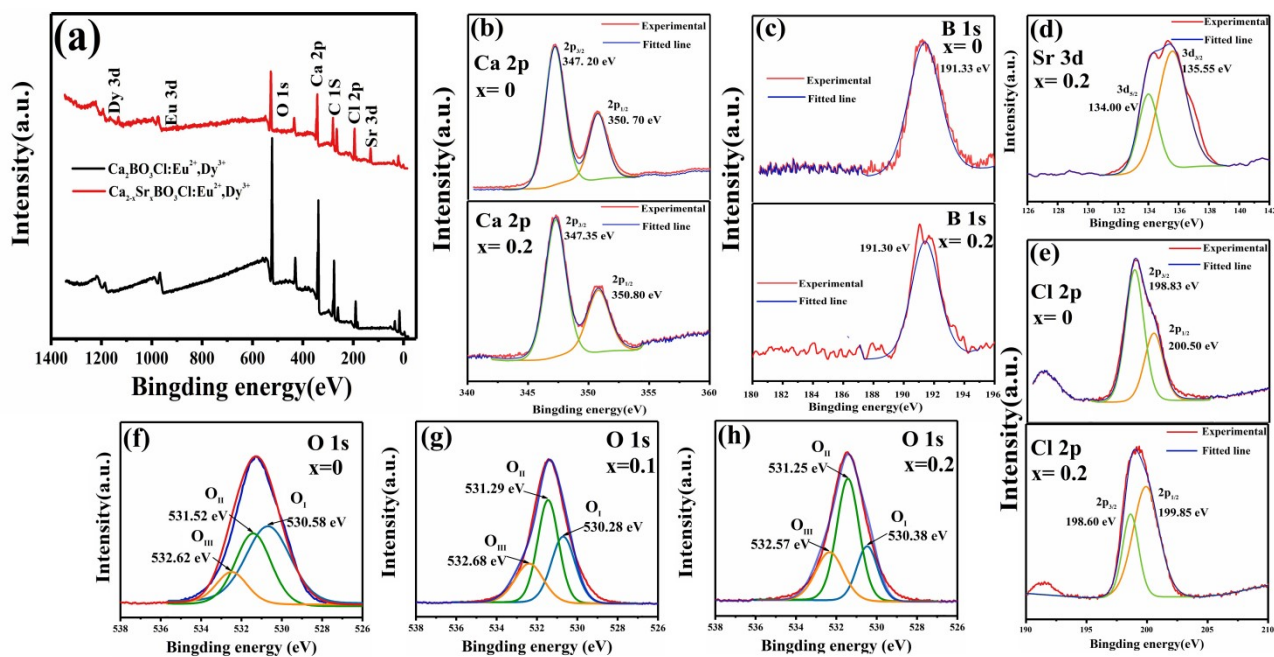

**Figure S8.** XPS survey spectra of  $\text{Ca}_{2-x}\text{Sr}_x\text{BO}_3\text{Cl}:\text{Eu}^{2+}, \text{Dy}^{3+}$ . b) Spectra at binding energies for Ca 2p; c) B 1s; d) Sr 3d; e) Cl 2p; f), g) and h) O 1s.

**Table S1.** The lattice parameters, volume, Refinement parameters of  $\text{Ca}_{2-x}\text{Sr}_x\text{BO}_3\text{Cl}$  (x= 0, 10%, 20%).

| Sample | a(Å)   | b(Å)   | c(Å)    | $\alpha=\gamma(^{\circ})$ | $\beta(^{\circ})$ | V(Å <sup>3</sup> ) | Z | R <sub>wp</sub> | P <sub>p</sub> | $\chi^2$ |
|--------|--------|--------|---------|---------------------------|-------------------|--------------------|---|-----------------|----------------|----------|
| x= 0   | 3.9338 | 8.6515 | 12.3504 | 90                        | 100.2708          | 413.58             | 4 | 12.08%          | 9.99%          | 1.538    |
| x= 10% | 3.9435 | 8.6720 | 12.3837 | 90                        | 100.2785          | 416.70             | 4 | 11.46%          | 8.47%          | 1.496    |
| x= 20% | 3.9485 | 8.6865 | 12.4046 | 90                        | 100.2841          | 418.63             | 4 | 11.08%          | 8.35%          | 1.487    |
